# Supplementary material
Source: Research Square preprint supplement (doi:10.21203/rs.3.rs-9139883/v1)
Supplement: Supplementary file 1 [file d5aff900301325fa7941c846.docx]

Supplementary Table 1

| **PACT ID** | **Study reference** | **Any published data?** | **Published PTSS-HR data?** | **Age range** | **Country** | **Year** | **Type of trauma** | **DSM version** | **n in original dataset** | **PTSS measure and timepoint*** |
| --- | --- | --- | --- | --- | --- | --- | --- | --- | --- | --- |
| 1001 | Kassam-Adams et al. 2005 | Y | Y | 8 to 17 | USA | 1999-2001 | Unintentional | IV | 243 | CATS (t3)  CAPS-CA (t7) |
| 1002 | Feinberg (2004) | N | Y | 5 to 8 | USA | 1999-2001 | Unintentional | IV | 122 | CASQ (t3)  PTSIC (t7) |
| 1004 | Fein et al. (2002) | Y | N | 8 to 18 | USA | 1999-2000 | Intentional | IV | 185 | CATS (t3)  CATS (t7) |
| 1010 | Le Brocque et al. (2010) | Y | N | 7 to 16 | Australia | 2000-2002 | Unintentional | IV | 151 | CIES (t2)  CIES (t7) |
| 1018 | Nugent et al. (2006) | Y | Y | 8 to 18 | USA | 2001-2003 | Unintentional | IV | 85 | CAPS-CA (t4)  CAPS-CA (t7) |
| 1020 | Meiser-Stedman et al. (2005) | Y | N | 10 to 16 | UK | 2001-2002 | Mixed (unintentional/intentional) | IV | 103 | CRIES (t3)  CRIES (t7) |
| 1021 | Meiser-Stedman et al. (2008) | Y | N | 2 to 10 | UK | 2004-2005 | Unintentional | IV | 113 | CAPS-CA (t3)  CAPS-CA (t7) |
| 1022 | Nixon et al. (2010) | Y | Y – subset of sample | 7 to 17 | Australia | 2004-2006 | Mixed (unintentional/intentional) | IV | 135 | CPSS (t3)  CAPS-CA (t7) |
| 1025 | Zatzick et al. (2006) | Y | N | 12 to 18 | USA | 2002-2003 | Mixed (unintentional/intentional) | IV | 108 | UCLA-RI (t2)  UCLA-RI (t6) |
| 1032 | De Haan et al. (2019) | Y | Y | 7 to 18 | Switzerland | 2016-2018 | Unintentional | V | 130 | UCLA-RI (t2)  UCLA-RI (t7) |
| 1036 | Marsac et al. (2017) | Y | N | 8 to 17 | USA | 2012 to 2014 | Mixed (unintentional/intentional) | IV | 101 | CPSS (t2)  CPSS (t6) |

*PTSS measures listed in Table X. Timepoints are based on PACT/R coding where t2 = 24 hours to 2 weeks, t3 = 2 weeks to one month, t4 = 1 month to 2 months, t6 = 3 months to 6 months, t7 = 6 months to 9 months

Supplementary Table 2

Final sample description

| PACT/R ID | *Mean (SD) heart rate for full dataset* | | *1-month dataset* | | | | | *6-month dataset* | | | | |
| --- | --- | --- | --- | --- | --- | --- | --- | --- | --- | --- | --- | --- |
|  | *boys* | *girls* | *n (after missing data removed)* | *% male* | *mean age (SD)* | *mean days since trauma (SD)* | *% intentional trauma* | *n (after missing data removed)* | *% male* | *mean age (SD)* | *mean days since trauma (SD)* | *% intentional trauma* |
| 1001 | 97.4 (18.2) | 106 (19.4) | 170 | 74.12 | 11.4 (2.6) | 17.7 (8.8) | 0 | 171 | 76.02 | 11.2 (2.3) | 194 (58) | 0 |
| 1002 | 112 (19.9) | 115 (23.5) | 91 | 61.54 | 6.2 (0.8) | 16.7 (7.4) | 0 | 71 | 60.56 | 6.1 (0.8) | 188 (54.9) | 0 |
| 1004 | 84 (12.7) | 91.6 (12) | 29 | 58.62 | 14.2 (1.5) | 26.5 (10.7) | 100 | 27 | 62.96 | 13.6 (2) | 195.9 (30.8) | 100 |
| 1010 | 91.6 (16.5) | 92.3 (12.8) | 140 | 63.57 | 10.4 (2.3) | 16.2 (10.1) | 0 | 136 | 64.71 | 10.3 (2.3) | 186.1 (12.8) | 0 |
| 1018 | 92.6 (19.3) | 91.7 (18.8) | 62 | 66.13 | 12.8 (2.8) | 42 (0) | 0 | 44 | 63.64 | 13.2 (3) | 180 (0) | 0 |
| 1020 | 86.1 (14.3) | 90 (13.4) | 59 | 64.41 | 13.6 (1.8) | 22.5 (11.1) | 54.24 | 43 | 65.12 | 13.7 (1.7) | 212.9 (30.6) | 51.16 |
| 1021 | 101 (18.7) | 101 (13.4) | 35 | 57.14 | 8.4 (1.6) | 26.1 (13.4) | 0 | 33 | 63.64 | 8.4 (1.6) | 205.8 (23.6) | 0 |
| 1022 | 87.2 (16.4) | 97.1 (19.4) | 87 | 60.92 | 12.3 (2.8) | 19.8 (7.7) | 8.24 | 58 | 62.07 | 12.2 (2.7) | 223.3 (25.2) | 5.36 |
| 1025 | 89.8 (21.2) | 103 (22.7) | 108 | 66.67 | 15.9 (1.9) | 12.9 (14.5) | 10.19 | 90 | 64.44 | 15.8 (1.9) | 155.8 (23.2) | 8.89 |
| 1032 | 90.1 (13.8) | 93.9 (19.1) | 100 | 57.0 | 10.7 (2.5) | 18 (7.6) | 0 | 95 | 60 | 10.7 (2.5) | 194.4 (17.1) | 0 |
| 1036 | 88.9 (15.3) | 96.4 (15.5) | 88 | 65.91 | 10.7 (1.8) | 2.7 (2.6) | 2.3 | 67 | 70.15 | 10.6 (1.8) | 98.8 (17.3) | 2.99 |
|  |  |  | **Total n = 969** |  |  |  |  | **Total n = 835** |  |  |  |  |

Supplementary Table 3

Meta-regression results

See excel spreadsheet.
