# Supplementary material
Source: Research Square preprint supplement (doi:10.21203/rs.3.rs-9139883/v1)
Supplement: Supplementary file 2 [file d9cda47e87f7ff0aefabc883.xlsx]

## Sheet: Sheet1
Meta-regression Analyses
1-month Data
Moderator Variable	a pathway (sex > RHR)					b pathway (RHR > PTSS)					c pathway (sex>PTSS)
	estimate	p-value	95% CIs	I^2	R^2	estimate	p-value	95% CIs	I^2	R^2	estimate	p-value	95% CIs	I^2	R^2
Trauma type	0.0004	0.83	-0.003, 0.004	0.5525	0	0.001	0.628	-0.003, 0.005	0.7526	0	0.001	0.74	-0.003, 0.004	0.5677	0
Age	0.04	0.001	0.016, 0.064	0.0001	0.9999	0.0061	0.802	-0.042, 0.054	0.7471	0	0.0345	0.026	0.004, 0.065	0.3125	0.595
Days since trauma	-0.004	0.5	-0.0137, 0.0066	0.5388	0	-0.0058	0.399	-0.019, 0.008	0.7311	0	0.0077	0.137	-0.003, 0.018	0.4873	0.1817
6-month Data
Moderator Variable	a pathway (sex > RHR)					b pathway (RHR > PTSS)					c pathway (sex>PTSS)
	estimate	p-value	95% CIs	I^2	R^2	estimate	p-value	95% CIs	I^2	R^2	estimate	p-value	95% CIs	I^2	R^2
Trauma type	0.004	0.017	0.0007, 0.0065	0.1915	0.6509	-0.002	0.446	-0.007, 0.003	0.7101	0.0414	0.0025	0.175	-0.001, 0.006	0.2246	0.2143
Age	0.027	0.097	-0.005, 0.059	0.2644	0.4518	0.005	0.838	-0.046, 0.0573	0.7374	0	0.0291	0.044	0.0008, 0.0574	0.0458	0.8606
Days since trauma	0.0008	0.578	-0.002, 0.004	0.4457	0	-0.002	0.336	-0.0059, 0.002	0.7039	0.0313	0	0.985	-0.003, 0.003	0.3236	0
